# Supplementary material for: Development and Validation of a Novel Nomogram for Predicting Vessels that Encapsulate Tumor Cluster in Hepatocellular Carcinoma
Source: PubMed Central journal article supplement — Cancer Control. 2022 May 24;29:10732748221102820. doi: 10.1177/10732748221102820 (PMC9136459; doi:10.1177/10732748221102820), 2022-05-24
Supplement: sj-pdf-1-ccx-10.1177_10732748221102820.pdf [file sj-pdf-1-ccx-10.1177_10732748221102820.pdf]

Supplementary Table 1. Clinical and pathological characteristics of 365 HCC patients.

| Parameters  | Variables    | N   | %     |
|-------------|--------------|-----|-------|
| VETC        | positive     | 87  | 23.84 |
|             | negative     | 278 | 76.16 |
| LMR         | $\leq 7.75$  | 345 | 94.52 |
|             | $> 7.75$     | 20  | 5.48  |
| PLR         | $\leq 40$    | 131 | 35.89 |
|             | $> 40$       | 234 | 64.11 |
| Neutrophils | $\leq 7$     | 345 | 94.52 |
|             | $> 7$        | 20  | 5.48  |
| GPR         | $\leq 0.17$  | 80  | 21.92 |
|             | $> 0.17$     | 285 | 78.08 |
| AAR         | $\leq 0.86$  | 156 | 42.74 |
|             | $> 0.86$     | 209 | 57.26 |
| ALRI        | $\leq 29.75$ | 266 | 72.88 |
|             | $> 29.75$    | 99  | 27.12 |
| ANRI        | $\leq 12.43$ | 234 | 64.11 |
|             | $> 12.43$    | 131 | 35.89 |
| APRI        | $\leq 0.21$  | 184 | 50.41 |
|             | $> 0.21$     | 181 | 49.59 |
| BLRI        | $\leq 21.73$ | 183 | 50.14 |
|             | $> 21.73$    | 182 | 49.86 |

|                 |          |     |       |
|-----------------|----------|-----|-------|
| SII             | ≤545.6   | 269 | 73.7  |
|                 | >545.6   | 96  | 23.6  |
| SIRI            | ≤0.64    | 110 | 30.14 |
|                 | >0.64    | 255 | 69.86 |
| ALT             | ≤40      | 186 | 50.96 |
|                 | >40      | 179 | 49.04 |
| AST             | ≤45      | 255 | 69.86 |
|                 | >45      | 110 | 30.14 |
| TB              | ≤17.1    | 290 | 79.45 |
|                 | >17.1    | 75  | 20.55 |
| PT              | ≤13.5    | 351 | 96.16 |
|                 | >13.5    | 14  | 3.84  |
| Gender          | female   | 46  | 12.6  |
|                 | male     | 319 | 87.4  |
| HBV infection   | negative | 43  | 11.78 |
|                 | positive | 322 | 88.22 |
| Splenomegaly    | negative | 303 | 83.01 |
|                 | positive | 62  | 16.99 |
| Liver cirrhosis | negative | 586 | 78.36 |
|                 | positive | 79  | 21.64 |
| Tumor number    | solitary | 317 | 86.85 |
|                 | multiple | 48  | 13.15 |
| Ascites         | negative | 361 | 98.9  |

|                    |            |                  |       |
|--------------------|------------|------------------|-------|
|                    | positive   | 4                | 1.1   |
| Tumor envelope     | complete   | 241              | 66.03 |
|                    | incomplete | 124              | 33.97 |
| Age                |            | 50.58±11.22      |       |
| AFP(ln)            |            | 4.71±3.28        |       |
| Tumor diameter(ln) |            | 1.55(1.13, 1.92) |       |

---

VETC: Vessels that encapsulate tumor cluster; LMR: lymphocyte to monocyte ratio; PLR: platelet-lymphocyte ratio; GPR:  $\gamma$ -glutamyl transpeptidase to platelet ratio; AAR: AST to ALT ratio; ALRI: AST to lymphocyte ratio index; ANRI: AST to neutrophil ratio index; APRI: AST to platelet ratio index; BLRI: ALT to lymphocyte ratio index; SII: systemic immune-inflammation index; SIRI: systemic inflammation response index.
